# Supplementary material for: Ocular Graft-versus-Host Disease in a Chemotherapy-Based Minor-Mismatch Mouse Model Features Corneal (Lymph-) Angiogenesis
Source: MDPI journal article supplement (doi:10.3390/ijms22126191), 2021-06-08
Supplement: s1 [file s1]

## Supplementary Material

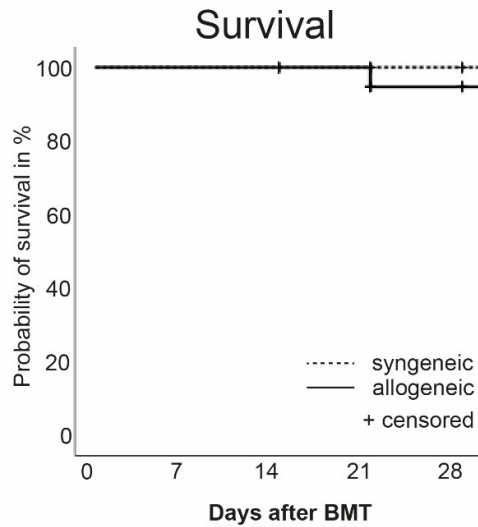

**Scheme S1.** Overall survival of mice after syngeneic or allogeneic BMT until termination of the experiments at day 28. Mice that were sacrificed on purpose before day 28 to be further analyzed were censored. No differences in the probability of survival between the groups were observed (log-rank test:  $p=0.4$ ).

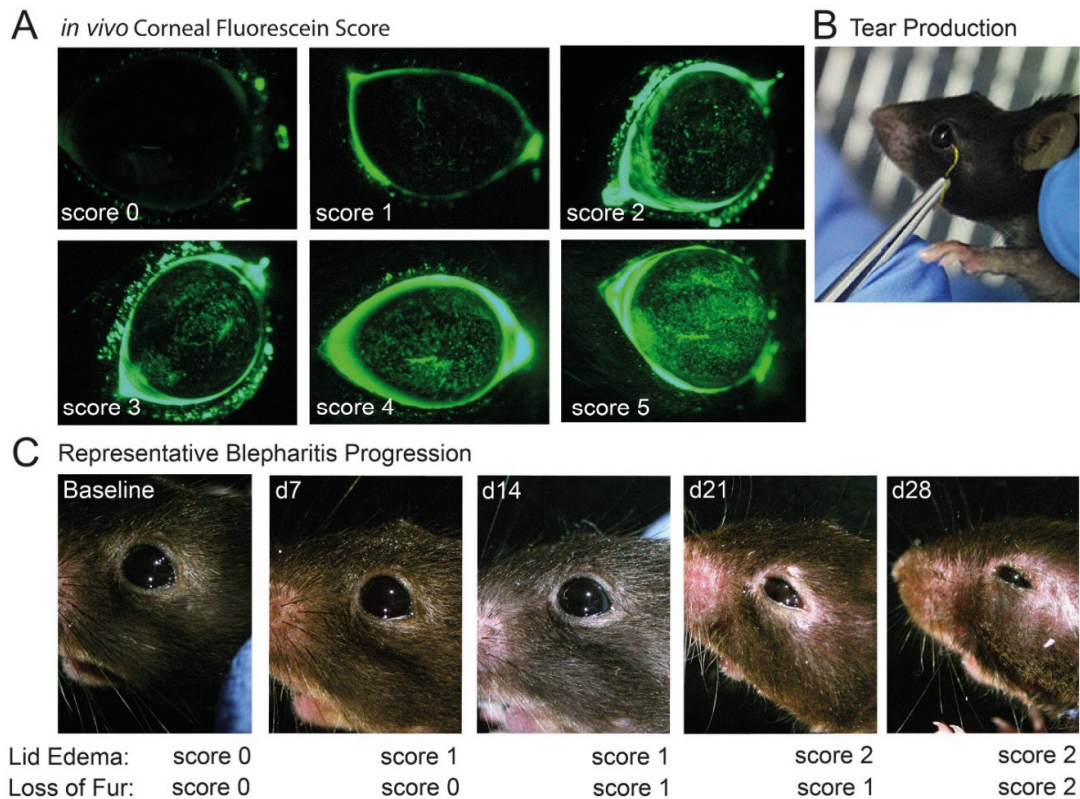

**Scheme S2.** Representative images of **A)** corneal fluorescein score, **B)** assessment of tear production using a phenol red thread and **C)** typical progression of blepharitis in experimental GVHD, following the same allogeneic transplanted mouse from baseline to day 28 after BMT. Lid edema/swelling and periorcular loss of fur were scored individually from 0-2 and summated to the final blepharitis score.

Scheme S3. Antibodies.

| Antibody-conjugate (clone)                            | Target            | Manufacturer (catalog no.)            |
|-------------------------------------------------------|-------------------|---------------------------------------|
| <b>Antibodies used for Flow Cytometry</b>             |                   |                                       |
| anti-mouse-CD4 <i>FITC</i> (RM 4-5)                   | CD4+ T cells      | Biolegend (#100509)                   |
| anti-mouse-CD8a <i>APC</i> (53-6.7)                   | CD8+ T cells      | Biolegend (#100711)                   |
| anti-mouse-CD3 <i>BV421</i> (17A2)                    | pan T cells       | Biolegend (#100227)                   |
| anti-mouse-CD45 <i>PE</i> (PC61)                      | pan leucocytes    | Biolegend (#102007)                   |
| Fixable Viability Dye <i>eFluor</i> <sup>TM</sup> 780 | dead cells        | Invitrogen (#65-0865-14)              |
| anti-mouse-Ly9.1 <i>PE</i> (30C7)                     | CD229+ thymocytes | BD Pharmingen (#560201)               |
| anti-mouse-H2kb <i>FITC</i> (AF6-88.5)                | MHC I kb          | BioLegend (#116505)                   |
| <b>Antibodies used for IHC</b>                        |                   |                                       |
| rat-anti-mouse-CD4 (H129.19)                          | CD4+ T cells      | BD Bioscience (#553647)               |
| rat-anti-mouse-CD8a (53-6.7)                          | CD8+ T cells      | Invitrogen (#14-0081-82)              |
| rabbit-anti mouse-LYVE-1                              | Lymphatics        | Abcam (#ab14917)                      |
| rat-anti-mouse-CD31                                   | Blood vessels     | BD Pharmingen (#558738)               |
| goat-anti-rat-Alexa Fluor <sup>TM</sup> 555           | Secondary AB      | Invitrogen (#A21434)                  |
| goat-anti-rabbit- <i>Cy3</i> <sup>TM</sup>            | Secondary AB      | Jackson ImmunoResearch (#111-165-045) |
